# Supplementary material for: Identification of the Short Neuropeptide F and Short Neuropeptide F Receptor Genes and Their Roles of Food Intake in Dendroctonus armandi
Source: MDPI journal article supplement (doi:10.3390/insects12090844), 2021-09-19
Supplement: s1 [file s1]

## Supplementary Information

**Table S1.** Primer sequences used in the research.

| Gene         | Sequence (5' → 3')                 |                             | purpose     |
|--------------|------------------------------------|-----------------------------|-------------|
|              | Forward                            | Reverse                     |             |
| <b>sNPF</b>  | ACCTCAGCTCCCTCGTAT                 | ACTCCTTGCGGAAGTTGTCG        | cDNA        |
|              | ACAACGCAATGAAAGTATTCTCTCT          | AATCGGTTATCACACAGTTTCAAG    | 3'RACE      |
|              | TCGCCAGAATACGAGGGAGC               | TAATTGTGGTGACCGTCCAG        | 5' RACE     |
|              | AACAACGCAATGAAAGTATTCTCTC          | GGGATACGTTTAGTTGTCGTTAGTG   | Full-length |
|              | TTCAACTCTTAACACCCAGTCTTCG          | TGAATAAGCATGTCAATCAGTTCTC   | qPCR        |
|              | TAATACGACTCACTATAGGGTCAGCCCCCTCTTA | TAATACGACTCACTATAGGGGTGATGT | RNAi        |
|              | TTCTGG                             | CATTCAAGCCGGT               |             |
| <b>sNPFR</b> | ACGAATCGCATGCTGATCG                | TCCTTGCGGAAGTTGTCG          | cDNA        |
|              | GGCGGTGTTTCTCATCTCCT               | TGGCTTAACGACAACCTCCG        | 3'RACE      |
|              | GTGAAGGGCACAGCCAATAC               | CATCAAGGTAAGCGTGGA          | 5' RACE     |
|              | GCTGACCGAAGCAATCAACGTGACC          | GAACTAGGGGTAGTCTTGTGGATGT   | Full-length |
|              | AGCAGTGGTATCAACGCAGAG              | GCATTCATTGGCATCATCAG        | qPCR        |
|              | TAATACGACTCACTATAGGGACATTTCCACGCTT | TAATACGACTCACTATAGGGTCCCTAT | RNAi        |
|              | ACCTTG                             | CCGCTTCCTCTTT               |             |
| <b>GFP</b>   | TAATACGACTCACTATAGGGATGGTGTTCATGC  | TAATACGACTCACTATAGGGCTCTCTT | RNAi        |
|              | TTTTCA                             | TTCGTTGGGGTCT               |             |

|          |                                                                                                               |                                        |      |     |
|----------|---------------------------------------------------------------------------------------------------------------|----------------------------------------|------|-----|
| At_sNPFR | MDVNGTNTLTANRELYQGKSLIIINNELVQIIFFMIYTAIFILGIGGNVLVCYVVFERNKACTVTNLFITNLALSDI                                 | LLCVLAVPFTPLYTLGKVI                    | FGS  | 99  |
| Ag_sNPFR | MNNTTPVKMASAVSNDDTNENIINDNTVQVVFHMVYTIIFVLGIGGNVLVCYVVFERNKACTVTNLFITNLALSDI                                  | LLCVLAVPFTPLYTLGKVI                    | FGR  | 99  |
| Ld_sNPFR | .....MNSFSNNTTVENIINENI.VQVAFHMVYTIIFVLGIGGNVLVCYVVFERNKACTVTNLFITNLALSDI                                     | LLCVLAVPFTPLYTLGKVI                    | FGR  | 91  |
| Dv_sNPFR | .....MAGAVSNNTTSEIINDNTVQVAFHMVYTIIFVLGIGGNVLVCYVVFERNKACTVTNLFITNLALSDI                                      | LLCVLAVPFTPLYTLGKVI                    | FGR  | 91  |
| So_sNPFR | .....MPVVDGI NVTTVHKLIIDKKG.VQVLFLLIAYTIIFVVGIGGNVLVCYVVFERNKACTVTNLFITNLALSDI                                | LLCVLAVPFTPLYTLGKVI                    | FGS  | 94  |
| Rf_sNPFR | .....MPVVDGI NVTTVHKLIIDKKG.VQVLFLLIAYTIIFVVGIGGNVLVCYVVFERNKACTVTNLFITNLALSDI                                | LLCVLAVPFTPLYTLGKVI                    | FGN  | 94  |
| Dp_sNPFR | .....NSLTDGI NVTTAAQQLIINDKKG.VQVLFHVIYTIIFVVGIGGNVLVCYVVFERNKACTVTNLFITNLALSDI                               | LLCVLAVPFTPLYTLGKVI                    | FGG  | 94  |
| Da_sNPFR | .....NSLTDGI NVTTTPQQLIINDKGGVQVLFHVIYTIIFVVGIGGNVLVCYVVFERNKACTVTNLFITNLALSDI                                | LLCVLAVPFTPLYTLGKVI                    | FGG  | 95  |
|          |                                                                                                               |                                        |      |     |
| At_sNPFR | IIICHVVPAAQGSVYI STLTLSIAIDRFVII YPFHPRMKLSTCVIIIIIIIVLFSLLVTPYGIYMRQAKGI ANSSTYQEENLFCBEDVPSDRVRKLF          |                                        |      | 199 |
| Ag_sNPFR | IIICHVVSAAQGISVYI STLTLSIAIDRFVII YPFHPRMKLSTCIIIIIIIVLFSMLVTPYGVYMRHTT. . . . .ENTSEI AI EKYFCLENVPSEBVRRTFG |                                        |      | 197 |
| Ld_sNPFR | IIICHVVSAAQGISVYI STLTLSIAIDRFVII YPFHPRMKLSTCIIIIIIIVLFSMLVTPYGVYMRK. . . . .TESYTDKFCBETVPSEBVRRTFG         |                                        |      | 185 |
| Dv_sNPFR | IIICHVVSAAQGISVYI STLTLSIAIDRFVII YPFHPRMKLSTCIIIIIIIVLFSMLVTPYGVYMRKLT. . . . .PAEKNAEYFCBENVPSEBVRRTFG      |                                        |      | 186 |
| So_sNPFR | IIICHVVPAAQGSVYI STLTLSIAIDRFVII YPFHPRMKLSTCVIIIIIIIVLFSLLVTPYGIYMRK. . . . .DPNNI TRYCEBDEVPVEQVRAAFG       |                                        |      | 189 |
| Rf_sNPFR | IIICHVVPAAQGSVYI STLTLSIAIDRFVII YPFHPRMKLSTCVIIIIIIIVLFSLLVTPYGIYMRK. . . . .DPNHETRYCEBDEVPVEQVRAAFG        |                                        |      | 189 |
| Dp_sNPFR | IIICHVVPAAQGSVYI STLTLSIAIDRFVII YPFHPRMKLSTCVIIIIIIIVLFSLLVTPYGIYMRHME. . . . .DPSNI SRFFCEBDEVPVEQVRAAFG    |                                        |      | 189 |
| Da_sNPFR | IIICHVVPAAQGSVYI STLTLSIAIDRFVII YPFHPRMKLSTCVIIIIIIIVLFSLLVTPYGIYMRHME. . . . .DPGNI TRFFCEBDEVPVEQVRAAFG    |                                        |      | 190 |
|          |                                                                                                               |                                        |      |     |
| At_sNPFR | GIITTLQFIIIPFLIYAGCYII CVSI KLNDRARPKGSKNSRKEEADREKRTNRMLI                                                    | SVAVFLMSVLP LNIIINDFN. DLIIVKVIYLSFSLV | TAIA | 298 |
| Ag_sNPFR | GIITTLQFIIIPFLIYAGCYII CVSI KLNDRARPKGSKNSRKEEADREKRTNRMLI                                                    | SVAVFLMSVLP LNIIINDFYQQNEHVVDNYLTFFFT  | TAIA | 297 |
| Ld_sNPFR | GIITTLQFIIIPFLIYAGCYII CVSI KLNDRARPKGSKNSRKEEADREKRTNRMLI                                                    | SVAVFLMSVLP LNIIINDFYQLQDQVAFYLTFFFT   | TAIA | 285 |
| Dv_sNPFR | GIITTLQFIIIPFLIYAGCYII CVSI KLNDRARPKGSKNSRKEEADREKRTNRMLI                                                    | SVAVFLMSVLP LNIIINDFCQQNEKVNFYLTFFFT   | TAIA | 286 |
| So_sNPFR | VITAAALQFIIIPFLIYAGCYII CVSI KLNDRARPKGSKNSRKEEADREKRTNRMLI                                                   | SVAVFLMSVLP LNIIINDFNKENI AVVEYFSLFSLV | QMA  | 289 |
| Rf_sNPFR | VITAAALQFIIIPFLIYAGCYII CVSI KLNDRARPKGSKNSRKEEADREKRTNRMLI                                                   | SVAVFLMSVLP LNIIINDFNKDNI SVVEYFSLFSLV | QMA  | 289 |
| Dp_sNPFR | VITAAALQFIIIPFLIYAGCYII CVSI KLNDRARPKGSKNSRKEEADREKRTNRMLI                                                   | SVAVFLMSVLP LNIIINDFNTDNI KVEYFSLFSLV  | QMA  | 289 |
| Da_sNPFR | VITAAALQFIIIPFLIYAGCYII CVSI KLNDRARPKGSKNSRKEEADREKRTNRMLI                                                   | SVAVFLMSVLP LNIIINDFNTDNI KVEYFSLFSLV  | QMA  | 290 |
|          |                                                                                                               |                                        |      |     |
| At_sNPFR | MSSTCYNPFYAWLNENFRKEFKQVLPCEFG. ANR. . . . .VVNNAGRLGNVSERTCNGN. . . . .ITQESLLP. SQIHRASIVKRNKTI PPPPKTDSVE  |                                        |      | 386 |
| Ag_sNPFR | MSSTCYNPFYAWLNENFRKEFKQVLPCEFG. PTG. . . . .RVPSACRFENVSERTCNGN. . . . .ETQESLLPSSQIHRASIRERKLI PPPPKTDSVE    |                                        |      | 386 |
| Ld_sNPFR | MSSTCYNPFYAWLNENFRKEFKQVLPCEFGSAG. . . . .RLPSACRFENVSERTCNGN. . . . .ETQESLLPSSQIHRASIRERKLI PPPPKTDSVE      |                                        |      | 376 |
| Dv_sNPFR | MSSTCYNPFYAWLNENFRKEFKQVLPCEFG. ASR. . . . .RVF. ACRFENVSERTCNGN. . . . .ETQESLLPSSQIHRASIRERKLI PPPPKTDSVE   |                                        |      | 375 |
| So_sNPFR | MSSTCYNPFYAWLNENFRKEFKQVLPCEFGASITKYSNRKVPSNSRFTNVSERTCN. . . . .GNETQETLLS. SQIHRASIRERKLI PPPPKTDSVE        |                                        |      | 383 |
| Rf_sNPFR | MSSTCYNPFYAWLNENFRKEFKQVLPCEFGASIVR. . . . .VPSNSRFTNVSERTCNGNEAYGNETQETLLS. SQIHRASIRERKLI PPPPKTDSVE        |                                        |      | 383 |
| Dp_sNPFR | MSSTCYNPFYAWLNENFRKEFKQVLPCEFGASGRR. . . . .APSTCRFTNVSERTCNGNETLAI NETQESLLP. SQIHRGSSFRERKLI PPPPKTDSVE     |                                        |      | 383 |
| Da_sNPFR | MSSTCYNPFYAWLNENFRKEFKQVLPCEFGASGRR. . . . .APSTCRFTNVSERTCNGNETFAI NETQESLLP. SQIHRGSSFRERKLI PPPPKTDSVE     |                                        |      | 384 |
|          |                                                                                                               |                                        |      |     |
| At_sNPFR | MENVLPVNI G. . . . .VVYDSLETSVRLRYI SEBEPPIYDTQQ. . . . .                                                     |                                        |      | 424 |
| Ag_sNPFR | MENVLPVSI G. . . . .VVYDSASDI VRLKLI TEBEPPIYEAAPRKDEE. . . . .                                               |                                        |      | 428 |
| Ld_sNPFR | MENVLPVAVG. . . . .VVYDSASDI VRLKLI TEBEPPIYEAAPRKDEE. . . . .                                                |                                        |      | 418 |
| Dv_sNPFR | MENVLPVSNA. . . . .VVYDSASDI VRLKLI TEBEPPIYEAAPKAVSE. . . . .                                                |                                        |      | 418 |
| So_sNPFR | MENVLPNMGV. . . . .BYDSALEVVKLNLI TEBEPPIYNEGRMSE. . . . .                                                    |                                        |      | 425 |
| Rf_sNPFR | MENVLPNMGVBYDSALEVVKLNLI TEBEPPIYNDTKSSSE. . . . .                                                            |                                        |      | 427 |
| Dp_sNPFR | IENVLPNSTV. . . . .BYDSNLEVVKLNLI TEBEPPIYSEI HKTTTPSSD                                                       |                                        |      | 427 |
| Da_sNPFR | MENVLPNSTV. . . . .BYDSNLEVVKLNLI TEBEPPIYSDI HKTTTPSSD                                                       |                                        |      | 428 |

**Figure S1.** Comparison of the amino acid sequence of *D. arandi* sNPFR with those of other species. They include *Dendroctonus ponderosae* (Dp sNPFR, XP\_019761868.1), *Rhynchophorus ferrugineus* (Rf sNPFR, QGA72517.1), *Sitophilus oryzae* (So sNPFR, XP\_030746843.1), *Diabrotica virgifera virgifera* (Dv sNPFR, XP\_028151444.1), *Leptinotarsa decemlineata* (Ld sNPFR, XP\_023019356.1), *Anoplophora glabripennis* (Ag sNPFR, XP\_018571523.1), *Aethina tumida* (At sNPFR, XP\_019867538.1). The predicted seven transmembrane domains are underlined by a solid line. Identical amino acid residues in all proteins are shown in black, grey parts indicate similar amino acids.

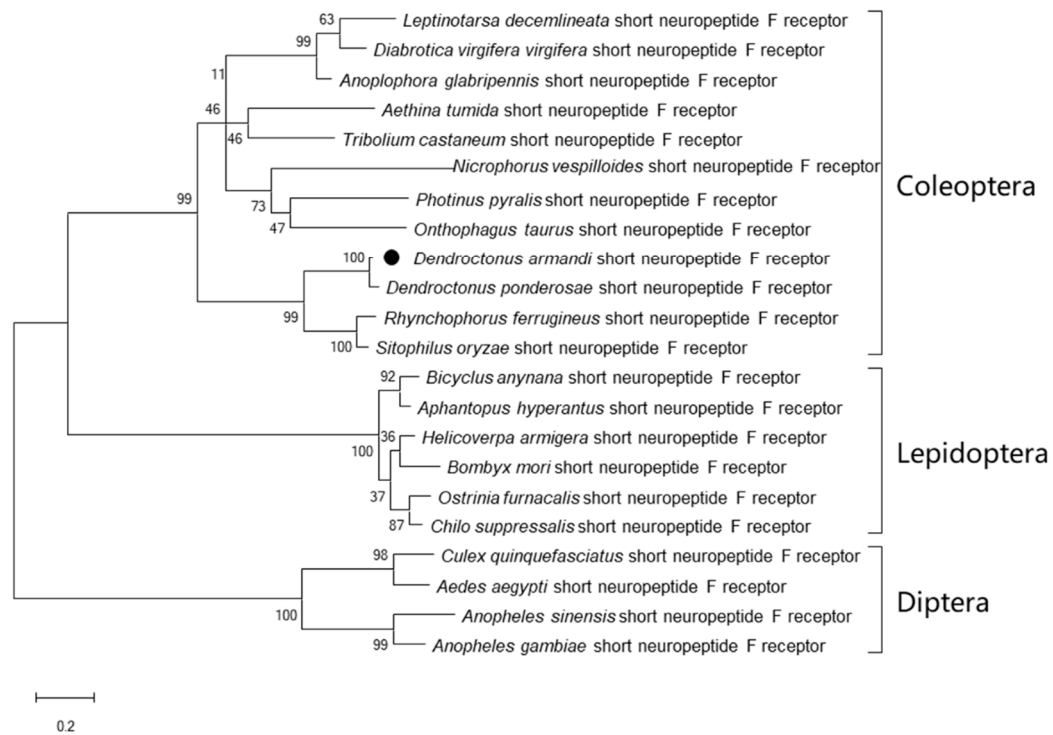

**Figure S2.** Phylogenetic trees based on amino acid sequences of sNPFR from other insect species. They include *Leptinotarsa decemlineata* (XP\_023019356.1), *Diabrotica virgifera virgifera* (XP\_028151444.1), *Anoplophora glabripennis* (XP\_018571523.1), *Aethina tumida* (XP\_019867538.1), *Tribolium castaneum* (XP\_015833194.1), *Nicrophorus vespilloides* (XP\_017779804.1), *Photinus pyralis* (XP\_031348170.1), *Onthophagus taurus* (XP\_022909330.1), *Dendroctonus ponderosae* (XP\_019761868.1), *Rhynchophorus ferrugineus* (QGA72517.1), *Sitophilus oryzae* (XP\_030746843.1), *Bicyclus anynana* (XP\_023934255.1), *Aphantopus hyperantus* (XP\_034831358.1), *Helicoverpa armigera* (XP\_021184191.1), *Bombyx mori* (ALP48446.1), *Ostrinia furnacalis* (XP\_028173698.1), *Chilo suppressalis* (ALM88307.1), *Culex quinquefasciatus* (AVR59280.1), *Aedes aegypti* (XP\_021705044.1), *Anopheles sinensis* (KFB49968.1), *Anopheles gambiae* (ABD96049.1). The phylogenetic tree constructed by the Maximum Likelihood method using the amino acid substitution model WAG++G+I+F122 in MEGA 6.0. Bootstrap values after 500 pseudo-replicates are shown at nodes. The bootstrap values (in %) are given at each branch point. The black dot indicates *D. armandi* sNPFR.
